# Supplementary material for: CRGO/alginate microbeads: an enzyme immobilization system and its potential application for a continuous enzymatic reaction
Source: Royal Society of Chemistry journal article supplement (doi:10.1039/c5tb01508a), 2015-01-01
Supplement: c5tb01508a1.pdf [file c5tb01508a1.pdf]

## Electronic Supplementary Information

### **CRGO/alginate microbeads: an excellent enzyme immobilization system and its potential application for continuous enzymatic reaction †**

Fuhua Zhao,<sup>a</sup> Hui Li,<sup>a</sup> Xicheng Wang,<sup>a</sup> Lin Wu,<sup>b</sup> Tonggang Hou,<sup>a</sup> Jing Guan,<sup>a</sup> Yijun Jiang,<sup>\*a</sup> Huanfei Xu,<sup>a</sup> and Xindong Mu<sup>\*a</sup>

*<sup>a</sup>Key Laboratory of Bio-based Materials, Qingdao Institute of Bioenergy and Bioprocess Technology, Chinese Academy of Sciences, Qingdao, 266101, P. R. China*

*Fax: +86-532-80662724; Tel: +86-532-80662723*

*<sup>b</sup>Qingdao Technical College, Qingdao, Shandong Province 266000*

**Corresponding author: Yijun Jiang and Xindong Mu**

**E-mail: [jiangyj@qibebt.ac.cn](mailto:jiangyj@qibebt.ac.cn); [muxd@qibebt.ac.cn](mailto:muxd@qibebt.ac.cn)**

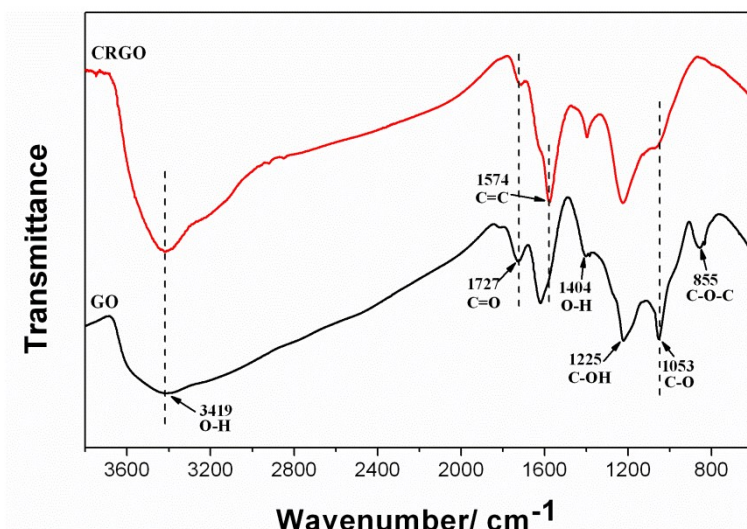

**Fig. S1.** FTIR spectra of GO and CRGO.

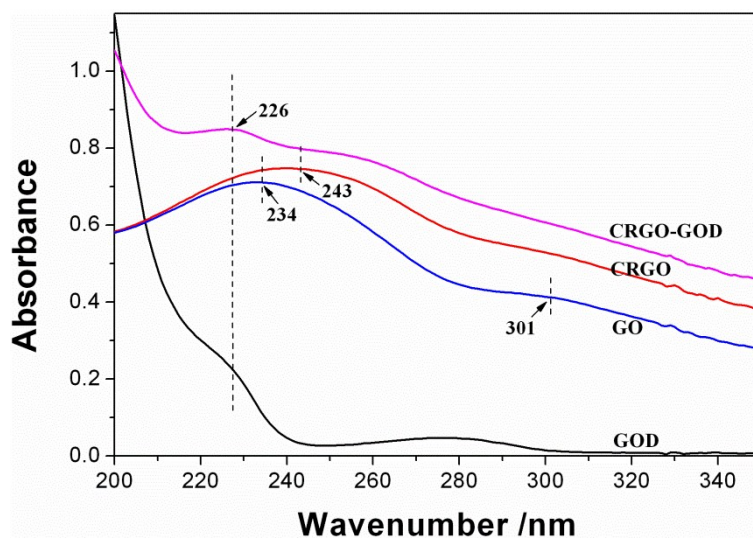

**Fig. S2.** UV/Vis spectra of GOD, GO, CRGO and CRGO-GOD.

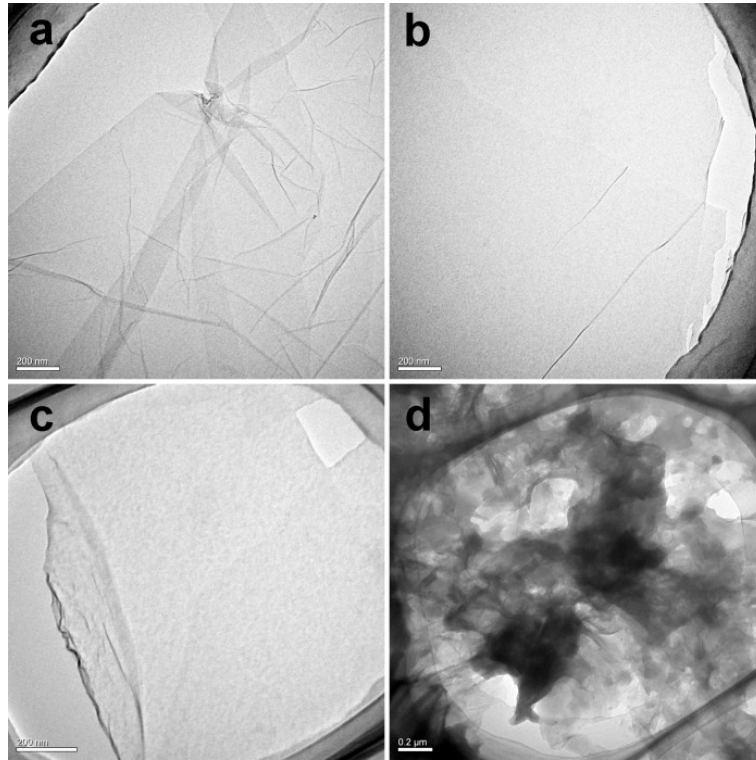

**Fig. S3.** TEM images of GO (a), CRGO (b), GOD-CRGO (c) and GOD-CRGO@Alg (d).

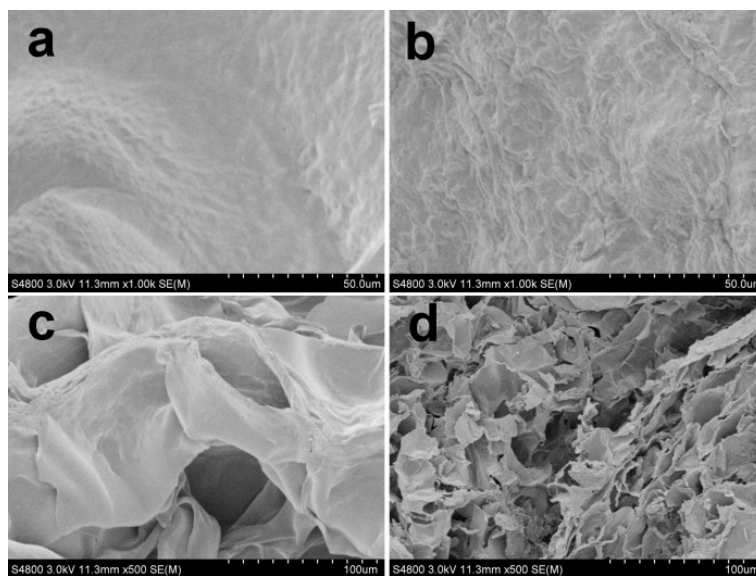

**Fig. S4.** SEM images of the surface of (a) GOD@Alg and (b) CRGO-GOD@Alg beads, and the cross section of (c) GOD@Alg and (d) CRGO-GOD@Alg beads. GOD@Alg shows a relatively smooth coating whereas CRGO-GOD@Alg leads to a more crumpled surface.

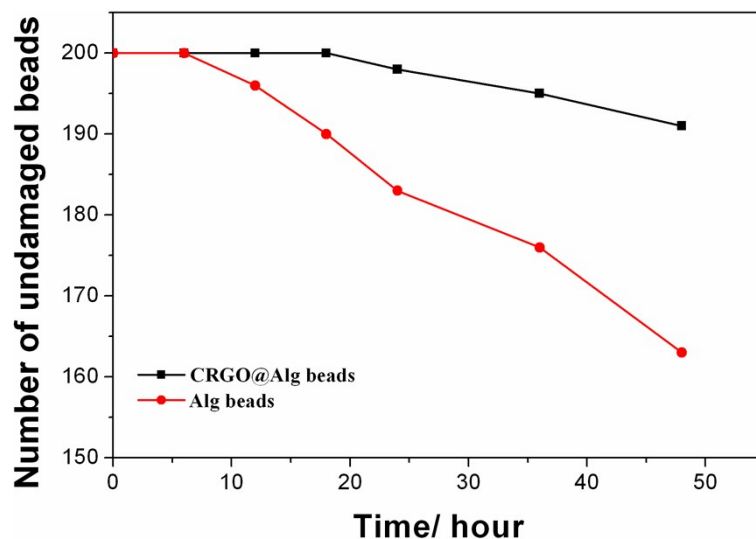

**Fig. S5.** Mechanical strength of alginate beads and CRGO-alginate hybrid beads. The number of undamaged CRGO-alginate hybrid beads was much more than that of alginate beads under the same conditions, which indicated that the mechanical strength was enhanced when CRGO was added.

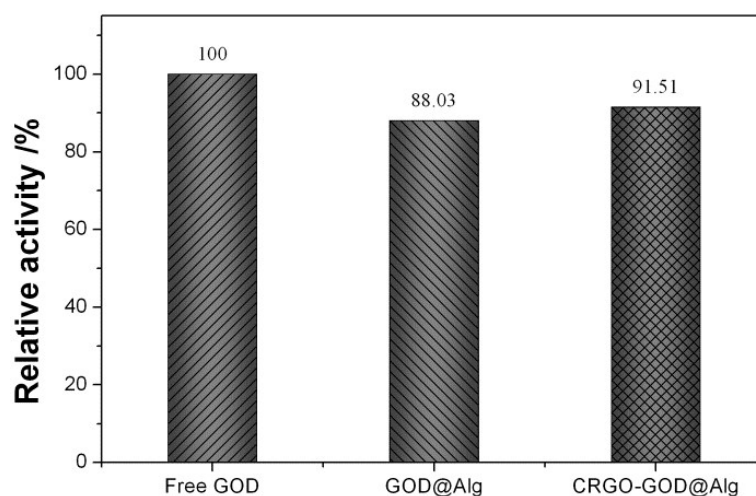

**Fig. S6.** Relative specific activity of the native GOD, GOD@Alg and CRGO-GOD@Alg. The specific activity of the free enzyme was set to 100%.

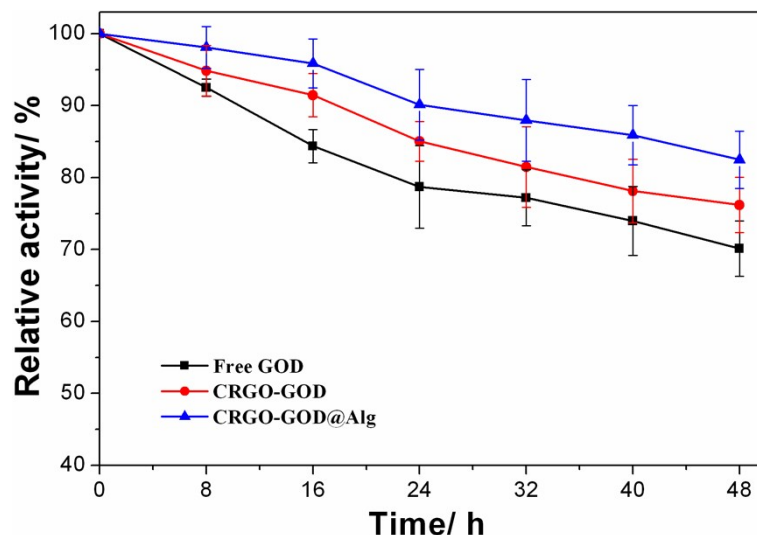

**Fig. S7.** Thermal stability of CRGO-GOD@Alg, CRGO-GOD and free GOD at 50°C (The initial enzymatic activity of each enzyme was set to 100%). Free and immobilized GOD was incubated in pH 5 buffer solution at 50°C for equal time. The activity of CRGO-GOD@Alg retained above 82% 48 hours later, which is obviously higher than the other two forms.

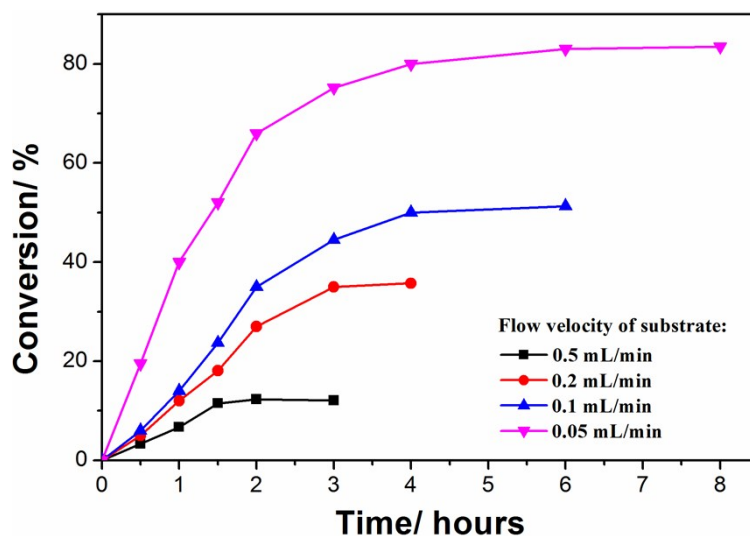

**Fig. S8.** Effect of the flow velocity of substrate on conversion (concentration of substrate: 0.5 mg/mL, temperature: 50°C).

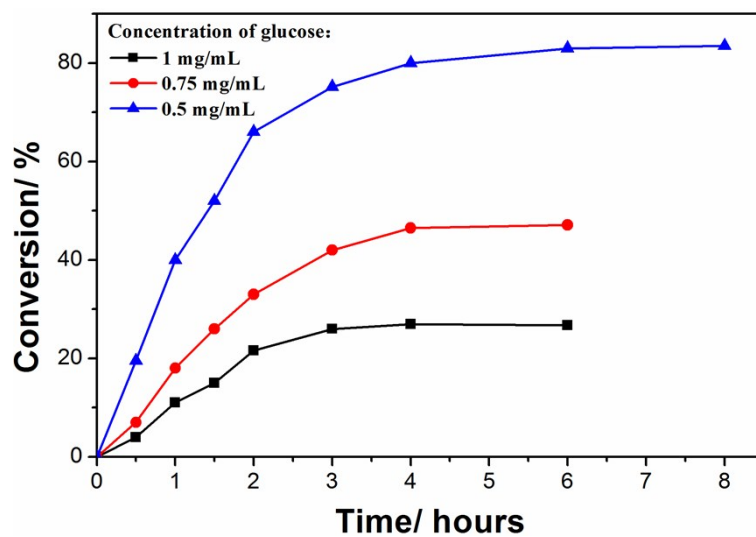

**Fig. S9.** Effect of the concentration of substrate on conversion (flow velocity of substrate: 0.05 mL/min, temperature: 50°C).
